# Supplementary material for: Identification and functional characterization of novel mutations including frameshift mutation in exon 4 of CSF1R in patients with adult-onset leukoencephalopathy with axonal spheroids and pigmented glia
Source: Springer Nature journal article supplement (doi:10.1007/s00415-018-9017-2), 2018-08-22
Supplement: MOESM1 [file 16064194]

**Supplementary Table 1** *In silico* analysis of variants in this study

| Patient No. | Variant                                | Exon | domain            | rs          | ExAC allele frequency               | <i>In silico</i> analysis     |                    |                      |            | CADD score |
|-------------|----------------------------------------|------|-------------------|-------------|-------------------------------------|-------------------------------|--------------------|----------------------|------------|------------|
|             |                                        |      |                   |             |                                     | Polyphen-2                    | SIFT               | PROVEAN              | VEP IMPACT |            |
| 1           | p.Pro104LeufsTer8<br>c.310delC         | 4    | Ig-like C2        | Novel       | -                                   | -                             | -                  | -                    | HIGH       | 25.20      |
| 2           | p.His362Arg (homo)<br>c.1085A>G        | 8    | Ig-like C2        | rs10079250  | 0.049<br>(East Asia<br>0.364)       | 0.065<br>BENIGN               | 0.061<br>Tolerated | -3.36<br>Deleterious | MODERATE   | 10.33      |
| 3           | p.Ile662Thr<br>c.1985T>C               | 15   | TKD<br>(Proximal) | Novel       | -                                   | 1.000<br>PROBABLY<br>DAMAGING | 0.001<br>Damaging  | -4.28<br>Deleterious | MODERATE   | 27.50      |
| 4           | p.Gly765Asp<br>c.2294G>A               | 18   | TKD<br>(Distal)   | rs690016566 | -                                   | 1.000<br>PROBABLY<br>DAMAGING | 0.000<br>Damaging  | -5.99<br>Deleterious | MODERATE   | 33.00      |
| 5           | p.Asp778Glu<br>c.2334C>A               | 18   | TKD<br>(Distal)   | Novel       | -                                   | 1.000<br>PROBABLY<br>DAMAGING | 0.000<br>Damaging  | -3.33<br>Deleterious | MODERATE   | 23.40      |
| 6           | p.Ile794Phe<br>c.2380A>T               | 18   | TKD<br>(Distal)   | Novel       | -                                   | 1.000<br>PROBABLY<br>DAMAGING | 0.000<br>Damaging  | -3.33<br>Deleterious | MODERATE   | 32.00      |
| 7, 8        | p.Ile794Thr<br>c.2381T>C               | 18   | TKD<br>(Distal)   | rs281860274 | 8.95351e-06<br>(East Asia<br>0.000) | 1.000<br>PROBABLY<br>DAMAGING | 0.000<br>Damaging  | -4.17<br>Deleterious | MODERATE   | 28.10      |
| 9           | p.Pro878Ser<br>c.2632C>T               | 20   | TKD<br>(Distal)   | Novel       | -                                   | 1.000<br>PROBABLY<br>DAMAGING | 0.021<br>Damaging  | -6.44<br>Deleterious | MODERATE   | 30.00      |
| 10          | p.Pro878Ala<br>c.2632C>G               | 20   | TKD<br>(Distal)   | Novel       | -                                   | 1.000<br>PROBABLY<br>DAMAGING | 0.010<br>Damaging  | -6.44<br>Deleterious | MODERATE   | 26.60      |
| 11          | p.Tyr886GlnfsTer55<br>c.2655_2656delAT | 21   | TKD<br>(Distal)   | Novel       | -                                   | -                             | -                  | -                    | HIGH       | 35.00      |

Polyphen-2, <http://genetics.bwh.harvard.edu/pph2/>; SIFT, <http://sift.jcvi.org/>; PROVEAN, <http://provean.jcvi.org/index.php>; VEP, <https://asia.ensembl.org/info/docs/tools/vep/index.html>; CADD score, <http://cadd.gs.washington.edu/score>

**Supplementary Table 2.** Imaging features of patients with *CSF1R* variants

| Patient No. | Variant                                | Bilateral cerebral white matter lesion | Thinning of Corpus callosum | DWI hyper intensity | Calcification on thin slice CT |          |
|-------------|----------------------------------------|----------------------------------------|-----------------------------|---------------------|--------------------------------|----------|
|             |                                        |                                        |                             |                     | Frontal                        | Parietal |
| 1           | p.Pro104LeufsTer8<br>c.310delC         | +                                      | -                           | +                   | +                              | +        |
| 2           | p.His362Arg (homo)<br>c.1085A>G        | +                                      | -                           | -                   | -                              | -        |
| 3           | p.Ile662Thr<br>c.1985T>C               | +                                      | +                           | +                   | n/a                            | n/a      |
| 4           | p.Gly765Asp<br>c.2294G>A               | +                                      | +                           | +                   | +                              | -        |
| 5           | p.Asp778Glu<br>c.2334C>A               | +                                      | +                           | -                   | +                              | +        |
| 6           | p.Ile794Phe<br>c.2380A>T               | +                                      | -                           | +                   | n/a                            | n/a      |
| 7           | p.Ile794Thr<br>c.2381T>C               | +                                      | -                           | +                   | +                              | -        |
| 8           | p.Ile794Thr<br>c.2381T>C               | +                                      | +                           | +                   | n/a                            | n/a      |
| 9           | p.Pro878Ser<br>c.2632C>T               | +                                      | +                           | +                   | +                              | -        |
| 10          | p.Pro878Ala<br>c.2632C>G               | +                                      | +                           | -                   | n/a                            | n/a      |
| 11          | p.Tyr886GlnfsTer55<br>c.2655_2656delAT | +                                      | +                           | +                   | +                              | -        |
